# Supplementary material for: Long-term durability antibacterial microcapsules with plant-derived Chinese nutgall and their applications in wound dressing
Source: publisher site journal article supplement (doi:10.1515/epoly-2019-0027), 2019-05-29
Supplement: Supplementary file 1 [file epoly-2019-0027_sm.pdf]

## Research Article

## Open Access

Wen Xue, Mengxing Zhang, Fan Zhao, Fujun Wang\*, Jing Gao and Lu Wang

# Long-term durability antibacterial microcapsules with plant-derived Chinese nutgall and their applications in wound dressing

## Supplementary material

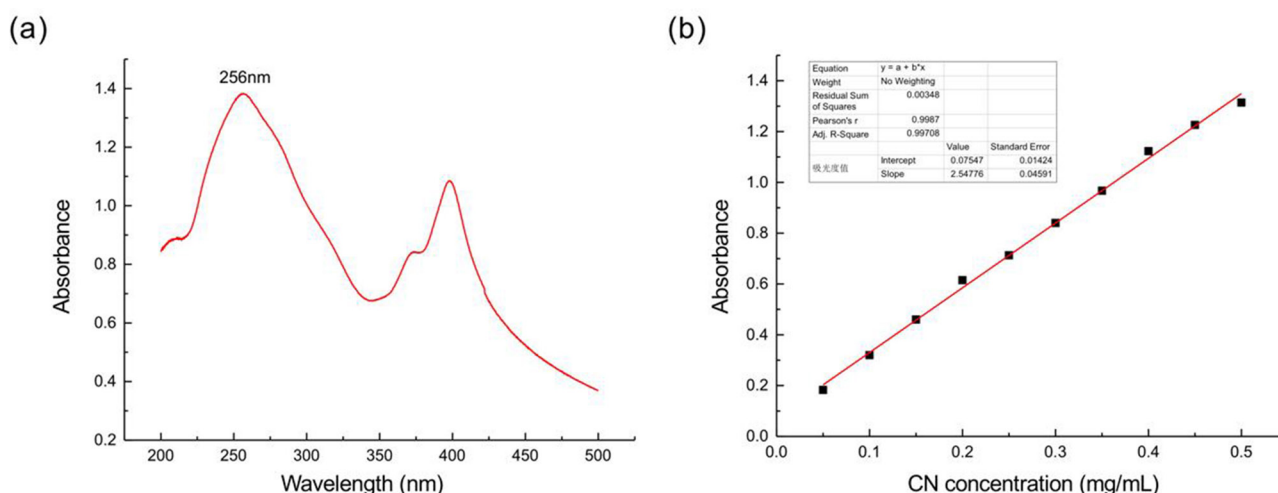

**Figure S1:** (a) The ultraviolet spectrum of CN in PBS (pH = 7.7); (b) CN concentration – absorbance curve.

\* **Corresponding author: Fujun Wang**, Key laboratory of Textile Science and Technology, Ministry of Education, China; College of Textiles, Donghua University, Shanghai 201620, China, e-mail: wangfujun@dhu.edu.cn. Tel. +862167792326

**Wen Xue, Mengxing Zhang, Fan Zhao, Jing Gao and Lu Wang**, Key laboratory of Textile Science and Technology, Ministry of Education, China; College of Textiles, Donghua University, Shanghai 201620, China, e-mail: xuwen9256@163.com (W. X.), 1508172976@qq.com (M. Zh.), zhaofan\_dhu@163.com (F. Zh.), gao2001jing@dhu.edu.cn (J. G.), wanglu@dhu.edu.cn (L. W.).

**Table S1:** Inhibition rates of microcapsules against *S. aureus*.

| Microcapsule loading concentration<br>(mg/mL) | Inhibition rates at different time (%) |            |            |            |
|-----------------------------------------------|----------------------------------------|------------|------------|------------|
|                                               | 3h                                     | 6h         | 12h        | 24h        |
| 1.5                                           | 36.63±0.24                             | 44.42±0.32 | 67.87±0.37 | 75.06±0.30 |
| 2.5                                           | 55.15±0.17                             | 78.36±0.11 | 85.28±0.33 | 92.42±0.41 |
| 3.5                                           | 71.55±0.68                             | 86.73±0.49 | 91.28±0.51 | 96.77±0.27 |
| 4.5                                           | 83.74±0.30                             | 94.89±0.25 | 98.99±0.29 | 100        |
| 5.5                                           | 100                                    | 100        | 100        | 100        |

**Table S2:** Inhibition rates of microcapsules against *E. coli*.

| Microcapsule loading concentration<br>(mg/mL) | Inhibition rates at different time (%) |            |            |            |
|-----------------------------------------------|----------------------------------------|------------|------------|------------|
|                                               | 3h                                     | 6h         | 12h        | 24h        |
| 2                                             | 43.90±0.41                             | 52.64±0.26 | 72.49±0.19 | 75.06±0.30 |
| 3                                             | 59.15±0.31                             | 81.34±0.46 | 90.58±0.50 | 92.42±0.41 |
| 4                                             | 74.34±0.26                             | 90.25±0.49 | 94.62±0.51 | 96.77±0.27 |
| 5                                             | 88.74±0.27                             | 99.61±0.32 | 100        | 100        |
| 6                                             | 100                                    | 100        | 100        | 100        |
